# Supplementary material for: Single-atom catalysts on supported silicomolybdic acid for CO2 electroreduction: a DFT prediction
Source: Royal Society of Chemistry journal article supplement (doi:10.1039/d1ta08285j), 2021-12-14
Supplement: d1ta08285j1.pdf [file d1ta08285j1.pdf]

## SUPPORTING INFORMATION

### Single-atom catalysts on supported silicomolybdic acid for CO<sub>2</sub> electroreduction: a DFT prediction

Congcong Zhao,<sup>a</sup> Xiaofang Su,<sup>b</sup> Shuo Wang,<sup>a</sup> Yu Tian,<sup>c</sup>

Likai Yan,<sup>\*a</sup> Zhongmin Su<sup>a</sup>

<sup>a</sup> Institute of Functional Material Chemistry, Key Laboratory of Polyoxometalate  
Science of Ministry of Education, Faculty of Chemistry, Northeast Normal University,  
Changchun 130024, P. R. China

<sup>b</sup> Henan Normal University, Henan 453007, P. R. China

<sup>c</sup> Institute for Interdisciplinary Quantum Information Technology, Jilin Engineering  
Normal University, Changchun 130052, P. R. China

\* To whom correspondence should be addressed. *E-mail*: yanlk924@nenu.edu.cn.

## Surface Pourbaix diagrams calculation

The oxidation mechanism of the catalyst by OH\* and O\* is as follows:

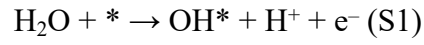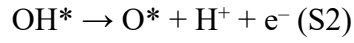

where \* represents the catalyst surface. OH\* and O\* are hydroxide and oxygen adsorbed on catalyst surface, respectively.

According to the computational hydrogen electrode model proposed by Nørskov et al.

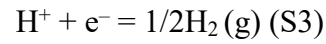

At given pH and potential, the free energy of reaction (S3) is:

$$\Delta G = eU + k_B T \ln 10 \text{ pH} \text{ (S4)}$$

Equation (S1) and (S2), which include the pH and potential, can be written as,

$$\Delta G(\text{OH}^*) = G(\text{OH}^*) - G(*) - G(\text{H}_2\text{O}) + 1/2G(\text{H}_2) - \Delta G \text{ (S5)}$$

$$\Delta G(\text{O}^*) = G(\text{O}^*) - G(*) - G(\text{H}_2\text{O}) + G(\text{H}_2) - 2\Delta G \text{ (S6)}$$

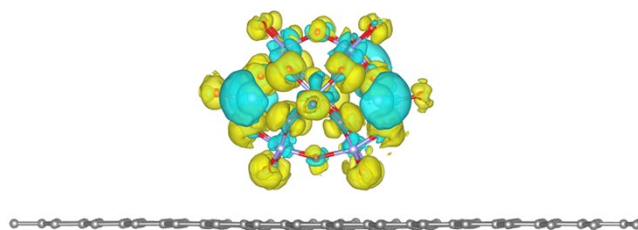

**Fig. S1** Charge density difference of  $\text{Na}_4\text{SiMo}_{12}$  adsorbed on graphene, with isosurface level of  $0.002 \text{ e}/\text{\AA}^3$ . The cyan and yellow regions represent electron depletion and accumulation, respectively.

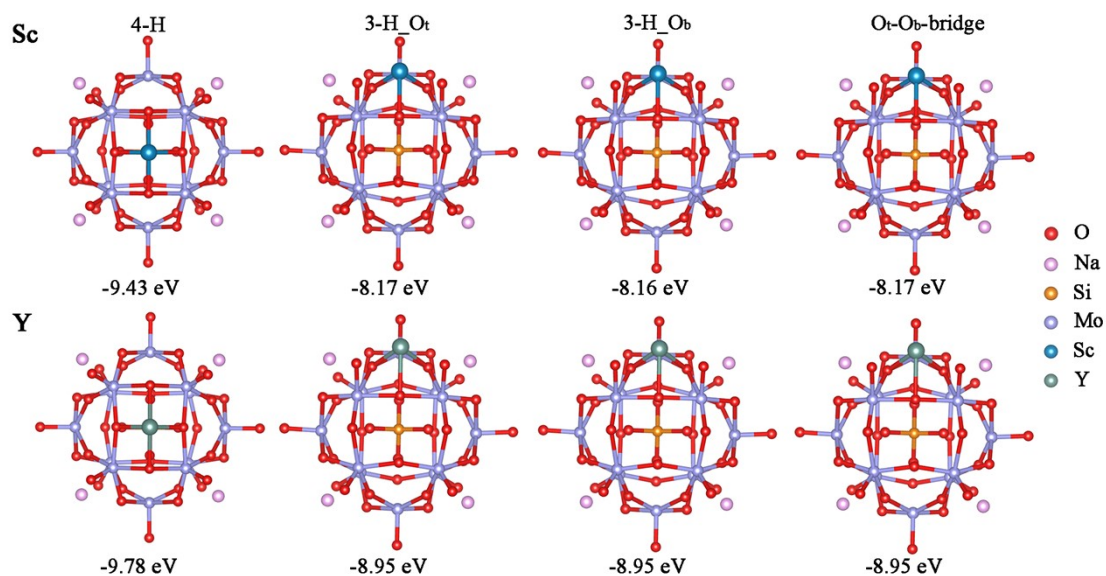

**Fig. S2** Optimized configurations of TM (TM = Sc and Y) on  $\text{Na}_4\text{SiMo}_{12}$  with TM initially located in 4-H, 3-H<sub>O<sub>t</sub></sub>, 3-H<sub>O<sub>b</sub></sub>, and O<sub>t</sub>-O<sub>b</sub>-bridge, respectively. The values in the figure represent the adsorption energies ( $E_{\text{ads}}$ ) of transition metals anchored at different sites of  $\text{Na}_4\text{SiMo}_{12}$ .

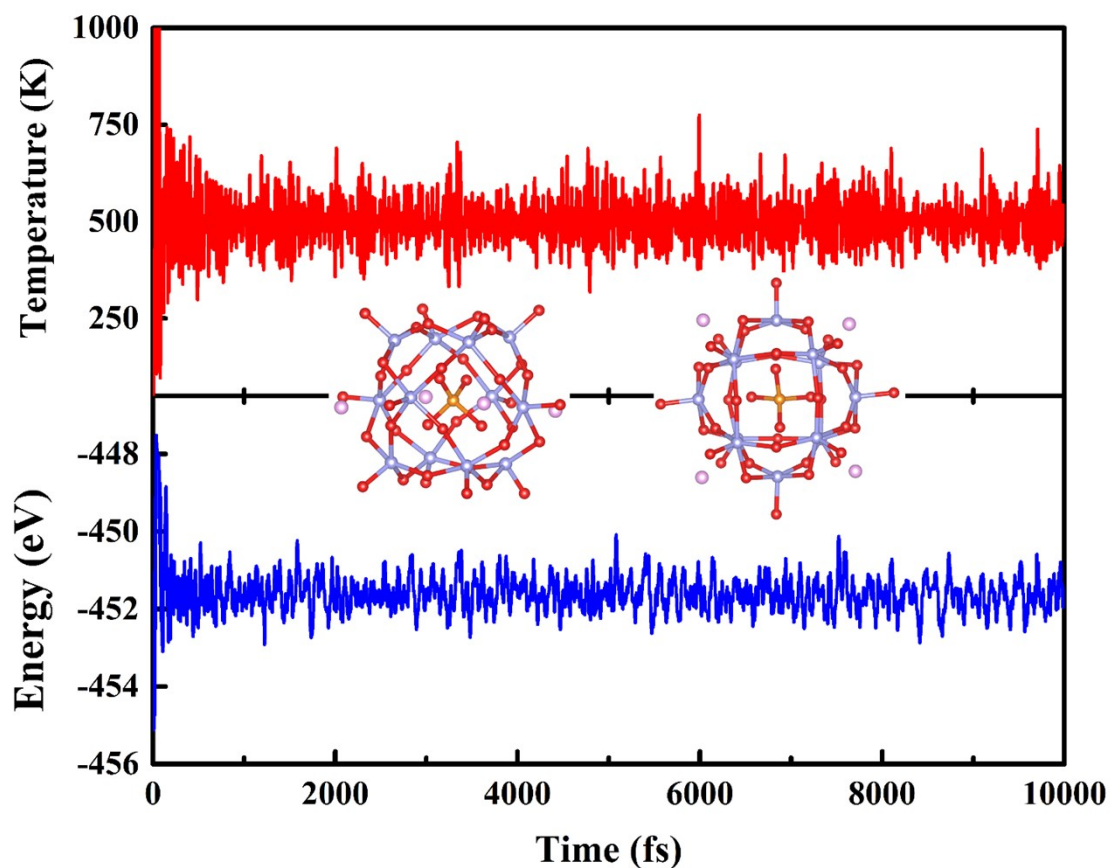

**Fig. S3** Variations of temperature and energy against time for AIMD simulation of  $\text{Na}_4\text{SiMo}_{12}$ , and the insets show top and side views of the snapshot of the atomic configuration. The simulation is run at 500 K for 10 ps with a time step of 1 fs.

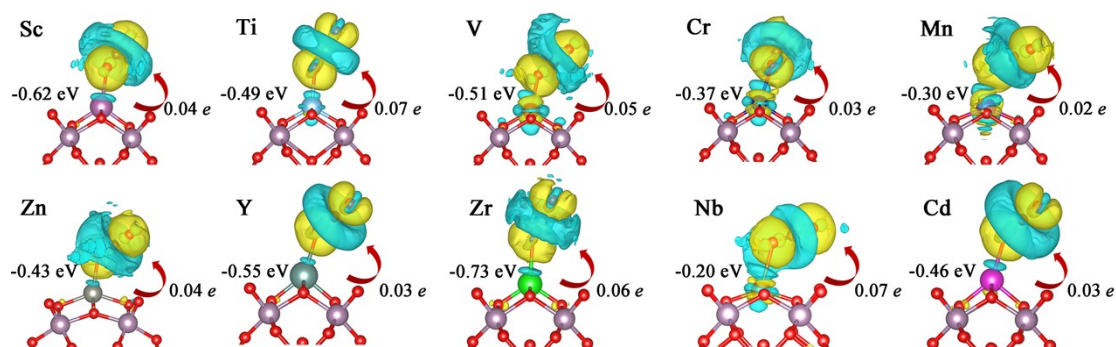

**Fig. S4** Charge density difference of  $\text{CO}_2$  adsorption over  $\text{TM}@Na_4\text{SiMo}_{12}$  (TM = Sc, Ti, V, Cr, Mn, Zn, Y, Zr, Nb and Cd), with isosurface level of  $0.005 \text{ e}/\text{\AA}^3$ . The cyan and yellow regions represent electron depletion and accumulation, respectively. The values in the figure represent the adsorption energies ( $E_{\text{ads}}$ ) of  $\text{CO}_2$  anchored at  $\text{TM}@Na_4\text{SiMo}_{12}$  and the amount of charge transferred from the  $\text{TM}@Na_4\text{SiMo}_{12}$  to  $\text{CO}_2$ .

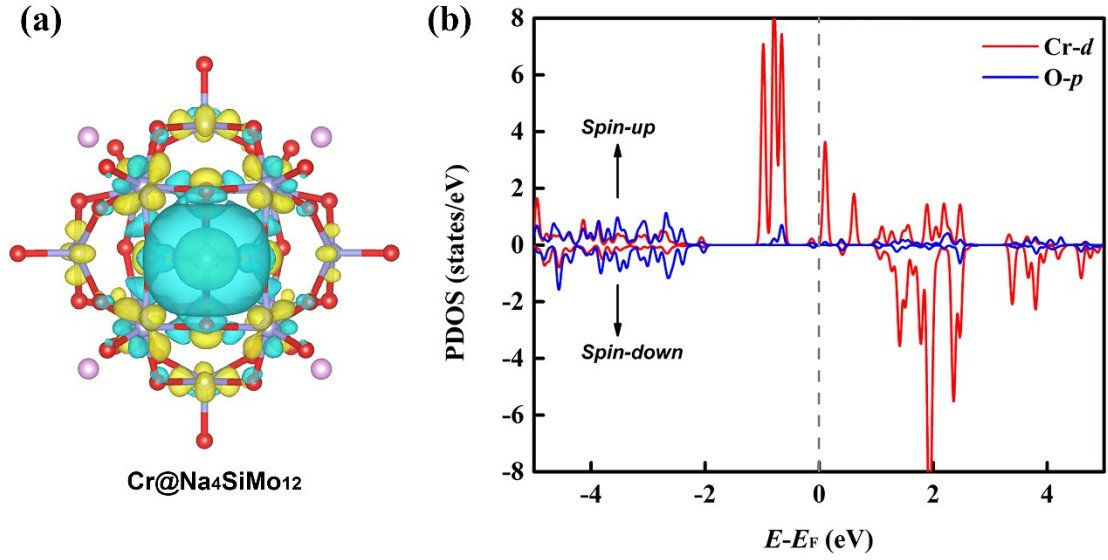

**Fig. S5** (a) The charge density difference of Cr anchor on the Na<sub>4</sub>SiMo<sub>12</sub>, with isosurface level of 0.005 e/Å<sup>3</sup>. The cyan and yellow regions represent electron depletion and accumulation, respectively. (b) The partial density of states (PDOS) of Cr anchor on the Na<sub>4</sub>SiMo<sub>12</sub>. The Fermi level is zero.

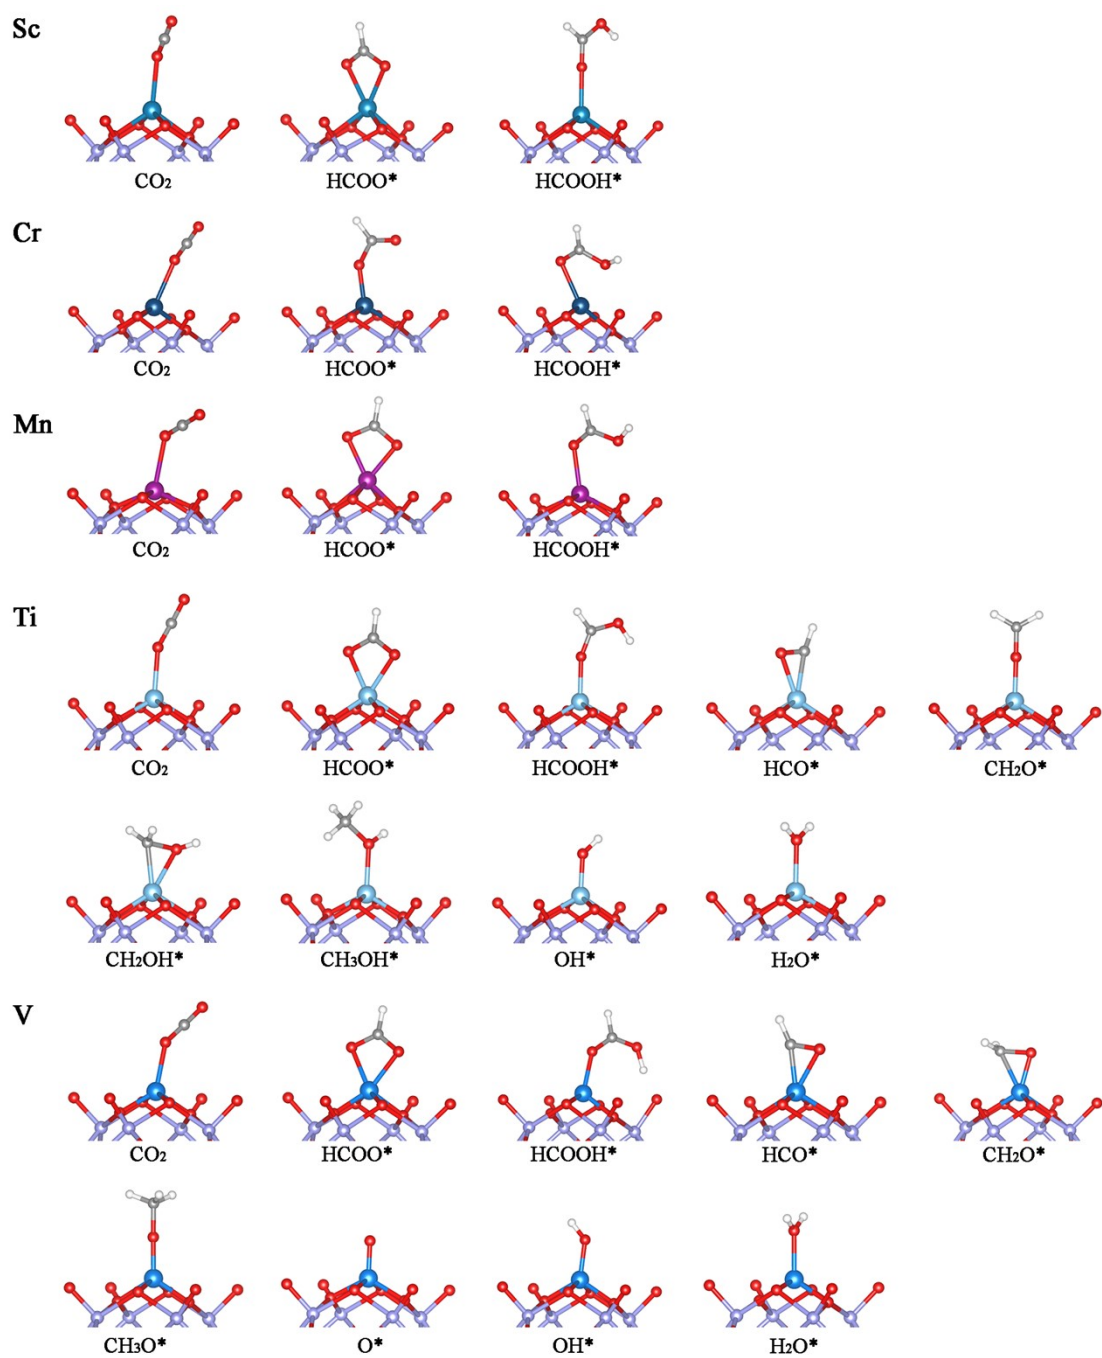

**Fig. S6** The optimized CO<sub>2</sub>RR intermediates along the most favorable pathway on TM@Na<sub>4</sub>SiMo<sub>12</sub> (TM = Sc, Cr, Mn, Ti and V).

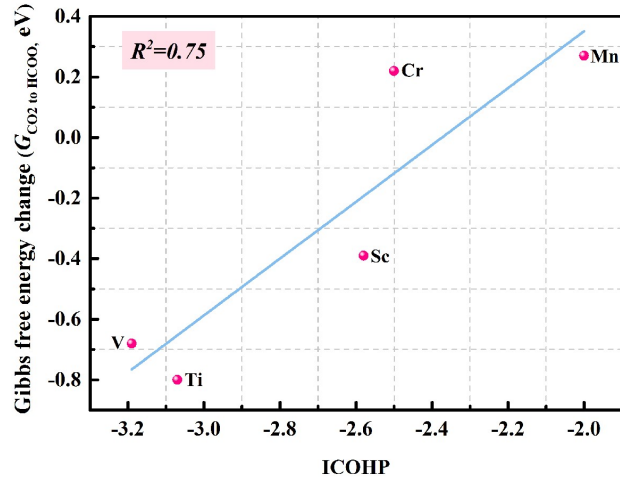

**Fig. S7** The relationship of calculated ICOHP values of the TM–O bond and the  $\Delta G$  of CO<sub>2</sub> to HCOO\* on TM@Na<sub>4</sub>SiMo<sub>12</sub> (TM = Sc, Cr, Mn, Ti and V).

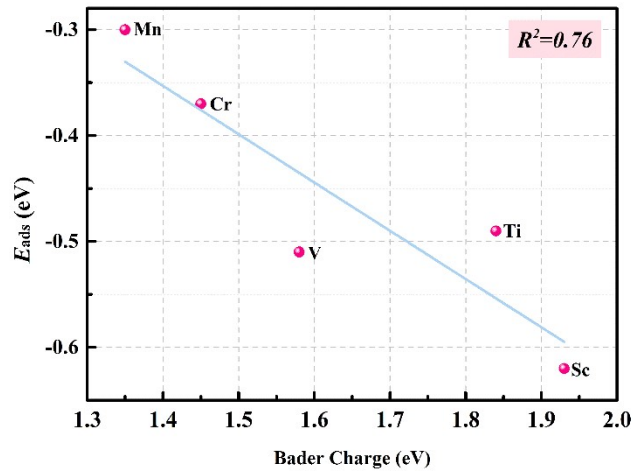

**Fig. S8** The relationship between the adsorption energies ( $E_{\text{ads}}$ ) of CO<sub>2</sub> and the Bader charges of TMs anchored on the TM@Na<sub>4</sub>SiMo<sub>12</sub> (TM = Sc, Cr, Mn, Ti and V).

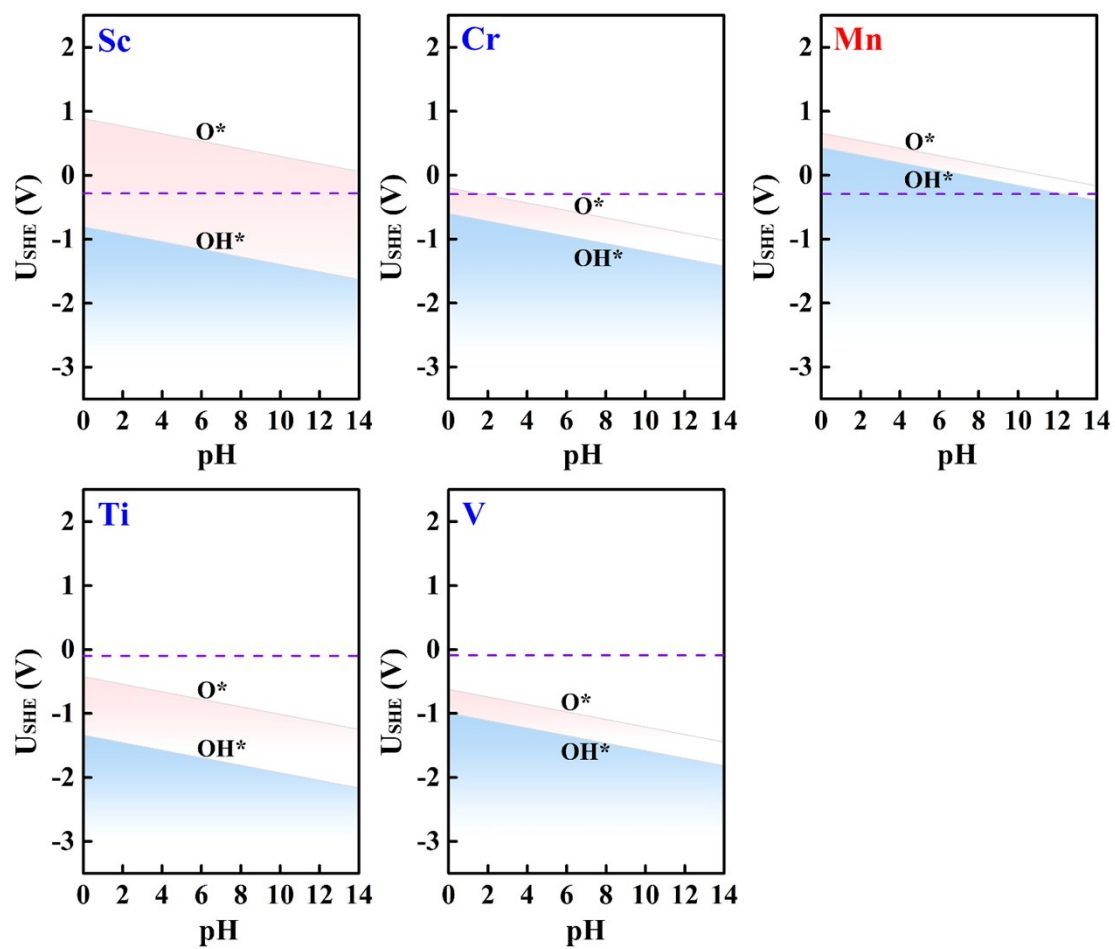

**Fig. S9** Surface Pourbaix diagrams of TMs@Na<sub>4</sub>SiMo<sub>12</sub> (TM = Sc, Cr, Mn, Ti and V).



**Table S1** The chemical potential of TM atom calculated from the metal bulk, and the corresponding adsorption energy ( $E_{\text{ads}}$ ).

| Metal | $\mu_{\text{TM}}$ (eV) | $E_{\text{ads}}$ (eV) |
|-------|------------------------|-----------------------|
| Sc    | -6.30                  | -5.18                 |
| Ti    | -8.05                  | -3.29                 |
| V     | -8.92                  | -1.90                 |
| Cr    | -9.46                  | -1.31                 |
| Mn    | -9.38                  | -0.91                 |
| Fe    | -8.23                  | 0.15                  |
| Co    | -7.27                  | 1.10                  |
| Ni    | -5.47                  | 0.55                  |
| Cu    | -3.73                  | 0.82                  |
| Zn    | -1.04                  | -0.64                 |
| Y     | -6.55                  | -5.35                 |
| Zr    | -8.67                  | -6.03                 |
| Nb    | -10.09                 | -1.61                 |
| Mo    | -10.92                 | 0.47                  |
| Tc    | -10.41                 | 1.35                  |
| Ru    | -9.70                  | 2.83                  |
| Rh    | -7.27                  | 2.53                  |
| Pd    | -5.21                  | 1.78                  |
| Ag    | -2.71                  | 0.55                  |
| Cd    | -0.66                  | -0.40                 |

**Table S2** The Bader charge of TMs and TM–O bond lengths for TM@Na<sub>4</sub>SiMo<sub>12</sub> (TM = Sc, Ti, V, Cr, Mn, Zn, Y, Zr, Nb and Cd).

| Metal | Bader charge (eV) | Pt–O bond length (Å)   |
|-------|-------------------|------------------------|
| Sc    | 1.93              | 2.05, 1.95, 2.05, 1.95 |
| Ti    | 1.84              | 1.93, 1.85, 1.93, 1.86 |
| V     | 1.58              | 1.91, 1.86, 1.91, 1.86 |
| Cr    | 1.45              | 1.96, 1.82, 1.96, 1.82 |
| Mn    | 1.35              | 1.89, 1.85, 1.89, 1.85 |
| Zn    | 1.21              | 2.09, 1.98, 2.09, 1.99 |
| Y     | 2.08              | 2.07, 1.99, 2.07, 1.98 |
| Zr    | 2.39              | 2.03, 1.95, 2.03, 1.94 |
| Nb    | 2.09              | 1.98, 1.94, 1.98, 1.93 |
| Cd    | 1.48              | 1.96, 1.81, 1.96, 1.82 |

**Table S3** Calculated free energy changes (in eV) for CO<sub>2</sub>RR on TM@Na<sub>4</sub>SiMo<sub>12</sub> (TM = Sc, Cr, Mn, Y, Zr, Ti and V)

|                 | Elementary steps                                                   | Sc    | Cr    | Mn    | Y     | Zr    | Nb    |
|-----------------|--------------------------------------------------------------------|-------|-------|-------|-------|-------|-------|
| 1e <sup>-</sup> | CO <sub>2</sub> + e <sup>-</sup> + H <sup>+</sup> → COOH*          | 1.07  | 0.79  | 1.10  | 1.08  | 0.15  | -0.36 |
|                 | CO <sub>2</sub> + e <sup>-</sup> + H <sup>+</sup> → HCOO*          | -0.46 | 0.22  | 0.48  | -0.61 | -1.37 | -1.55 |
| 2e <sup>-</sup> | HCOO* + e <sup>-</sup> + H <sup>+</sup> → HCOOH*                   | 0.46  | 0.23  | 0.10  | 0.82  | 1.17  | 1.26  |
|                 | HCOOH* → HCOOH(l) + *                                              | 0.43  | -0.03 | -0.15 | 0.22  | 0.63  | 0.72  |
| 3e <sup>-</sup> | HCOOH* + e <sup>-</sup> + H <sup>+</sup> → HCO* + H <sub>2</sub> O | 1.37  | 0.38  | 0.48  | 1.22  | 0.62  | 0.15  |

|                 | Elementary steps                                                                             | Ti    | V     |
|-----------------|----------------------------------------------------------------------------------------------|-------|-------|
| 1e <sup>-</sup> | CO <sub>2</sub> + e <sup>-</sup> + H <sup>+</sup> → COOH*                                    | 0.44  | 0.17  |
|                 | CO <sub>2</sub> + e <sup>-</sup> + H <sup>+</sup> → HCOO*                                    | -0.81 | -0.67 |
| 2e <sup>-</sup> | HCOO* + e <sup>-</sup> + H <sup>+</sup> → HCOOH*                                             | 0.47  | 0.59  |
|                 | HCOOH* → HCOOH(l) + *                                                                        | 0.77  | 0.52  |
| 3e <sup>-</sup> | HCOOH* + e <sup>-</sup> + H <sup>+</sup> → HCO* + H <sub>2</sub> O                           | 0.70  | 0.47  |
| 4e <sup>-</sup> | HCO* + e <sup>-</sup> + H <sup>+</sup> → CH <sub>2</sub> O*                                  | -0.97 | -0.65 |
|                 | HCO* + e <sup>-</sup> + H <sup>+</sup> → CHOH*                                               | 0.79  | 0.47  |
| 5e <sup>-</sup> | CH <sub>2</sub> O* + e <sup>-</sup> + H <sup>+</sup> → CH <sub>3</sub> O*                    | 1.68  | -1.17 |
|                 | CH <sub>2</sub> O* + e <sup>-</sup> + H <sup>+</sup> → CH <sub>2</sub> OH*                   | 0.54  | 0.16  |
| 6e <sup>-</sup> | CH <sub>2</sub> OH* + e <sup>-</sup> + H <sup>+</sup> → CH <sub>3</sub> OH*                  | -0.72 | —     |
|                 | CH <sub>2</sub> OH* + e <sup>-</sup> + H <sup>+</sup> → CH <sub>2</sub> * + H <sub>2</sub> O | 0.72  | —     |
|                 | CH <sub>3</sub> O* + e <sup>-</sup> + H <sup>+</sup> → CH <sub>3</sub> OH*                   | —     | 0.85  |
|                 | CH <sub>3</sub> OH* → CH <sub>3</sub> OH(g) + *                                              | 0.96  | 0.75  |
| 7e <sup>-</sup> | CH <sub>3</sub> O* + e <sup>-</sup> + H <sup>+</sup> → CH <sub>4</sub> + O*                  | —     | -0.76 |
|                 | CH <sub>3</sub> OH* + e <sup>-</sup> + H <sup>+</sup> → CH <sub>4</sub> + OH*                | -1.64 | -1.83 |
|                 | O* + e <sup>-</sup> + H <sup>+</sup> → OH*                                                   | —     | -0.21 |
| 8e <sup>-</sup> | OH* + e <sup>-</sup> + H <sup>+</sup> → H <sub>2</sub> O*                                    | 0.69  | 0.74  |
|                 | H <sub>2</sub> O* → H <sub>2</sub> O(l) + *                                                  | 0.73  | 0.66  |
